# Supplementary material for: IFITM3 Inhibits Influenza A Virus Infection by Preventing Cytosolic Entry
Source: PubMed Central journal article supplement (PMC3203188; doi:10.1371/journal.ppat.1002337), 2011-10-27

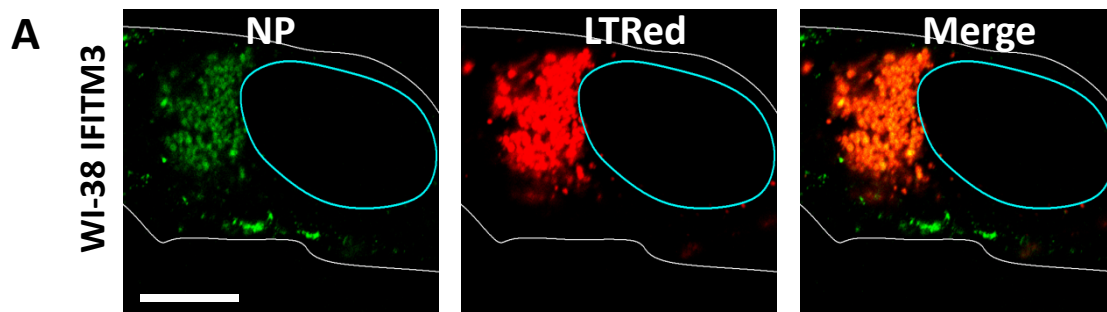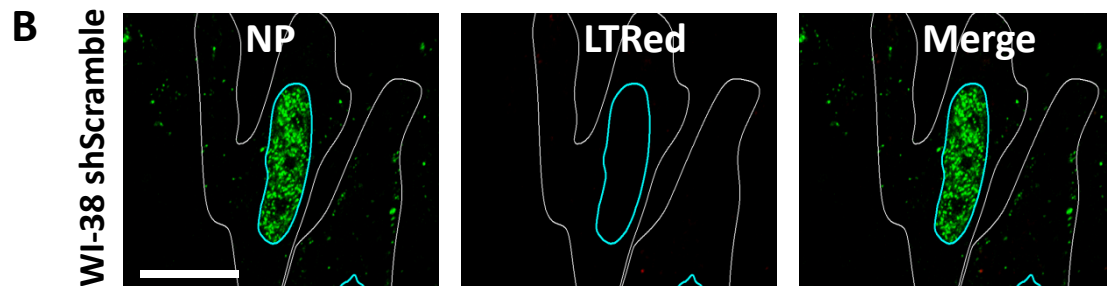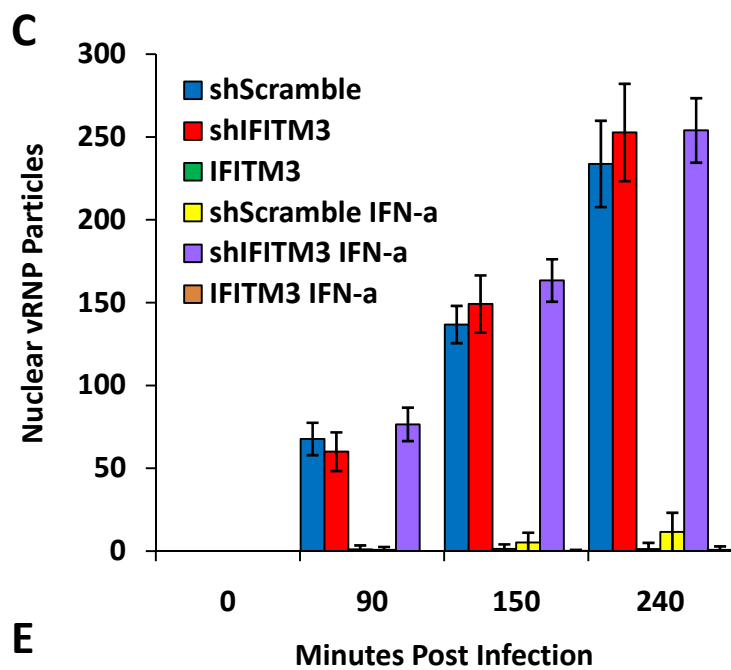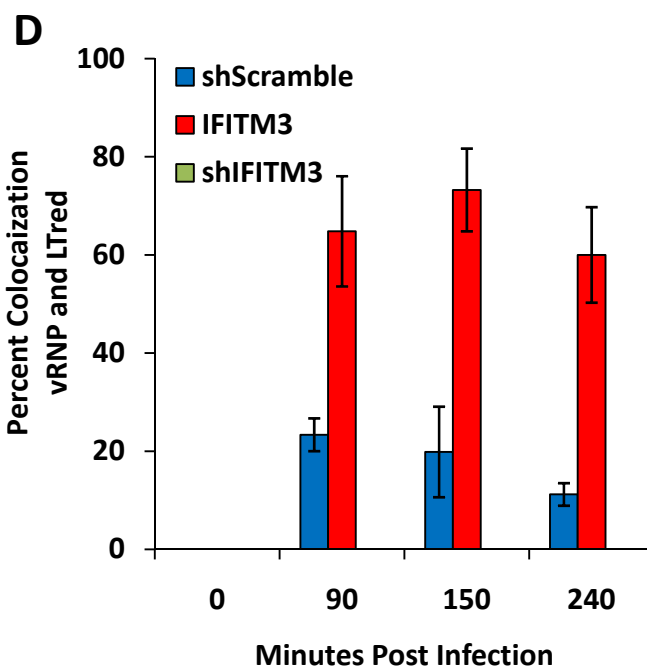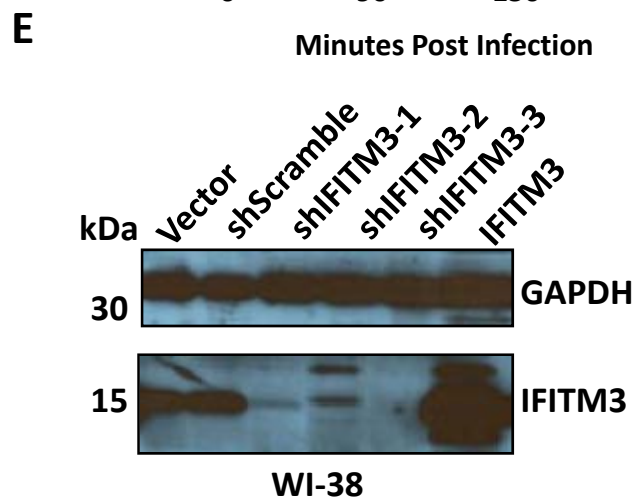

Supplement: ppat.1002337.s002.pdf [file ppat.1002337.s002.pdf]
